# Supplementary material for: A universal deep neural network for in-depth cleaning of single-cell RNA-Seq data
Source: PubMed Central journal article supplement (PMC8990021; doi:10.1038/s41467-022-29576-y), 2022-04-07
Supplement: 41467_2022_29576_MOESM1_ESM.pdf [file 41467_2022_29576_MOESM1_ESM.pdf]

# **A Universal Deep Neural Network for In-Depth Cleaning of Single-Cell RNA-Seq Data**

Hui Li<sup>1,2</sup>, Cory R. Brouwer<sup>1,2</sup>, Weijun Luo<sup>1,2,3\*</sup>

<sup>1</sup>Department of Bioinformatics and Genomics, College of Computing and Informatics, UNC Charlotte, Charlotte, NC 28223

<sup>2</sup>UNC Charlotte Bioinformatics Service Division, North Carolina Research Campus, Kannapolis, NC 28081

<sup>3</sup>Novant Health, Charlotte, NC 28207 (current address)

\*Correspondence: [luo\\_weijun@yahoo.com](mailto:luo_weijun@yahoo.com)

## **Supplementary Materials**

Supplementary Figures 1 to 11

Supplementary Tables 1 to 3

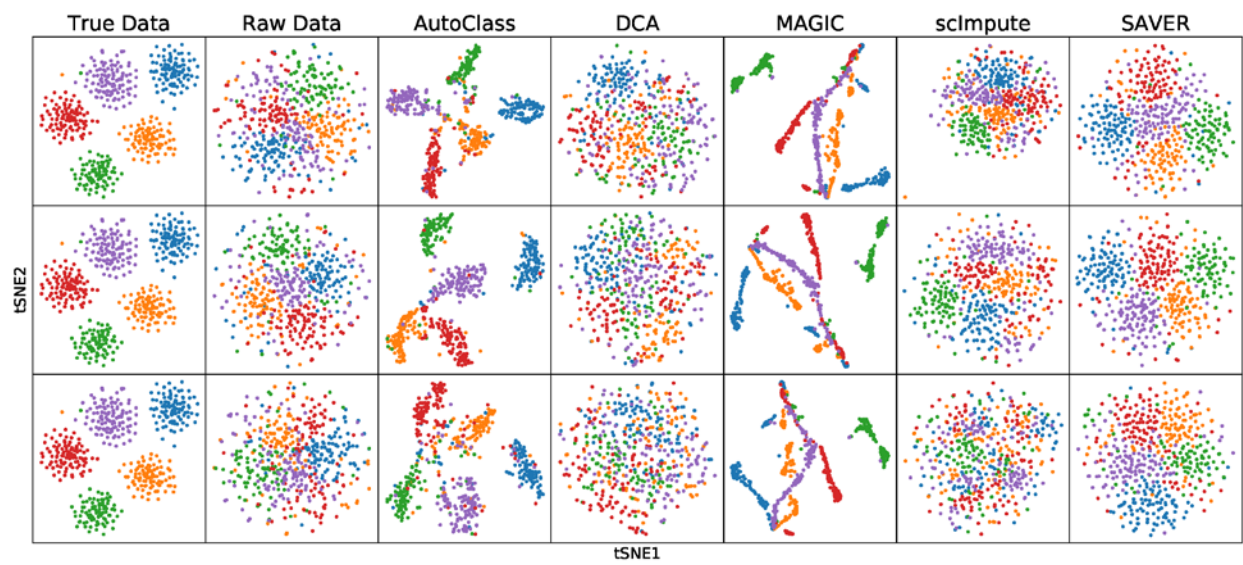

**Supplementary Figure 1** t-SNE plots for Dataset 3 (first row, random uniform noise), Dataset 5 (second row, Gamma noise) and Dataset 6 (third row, Poisson noise). Experiments settings are similar to those in Figure 2.

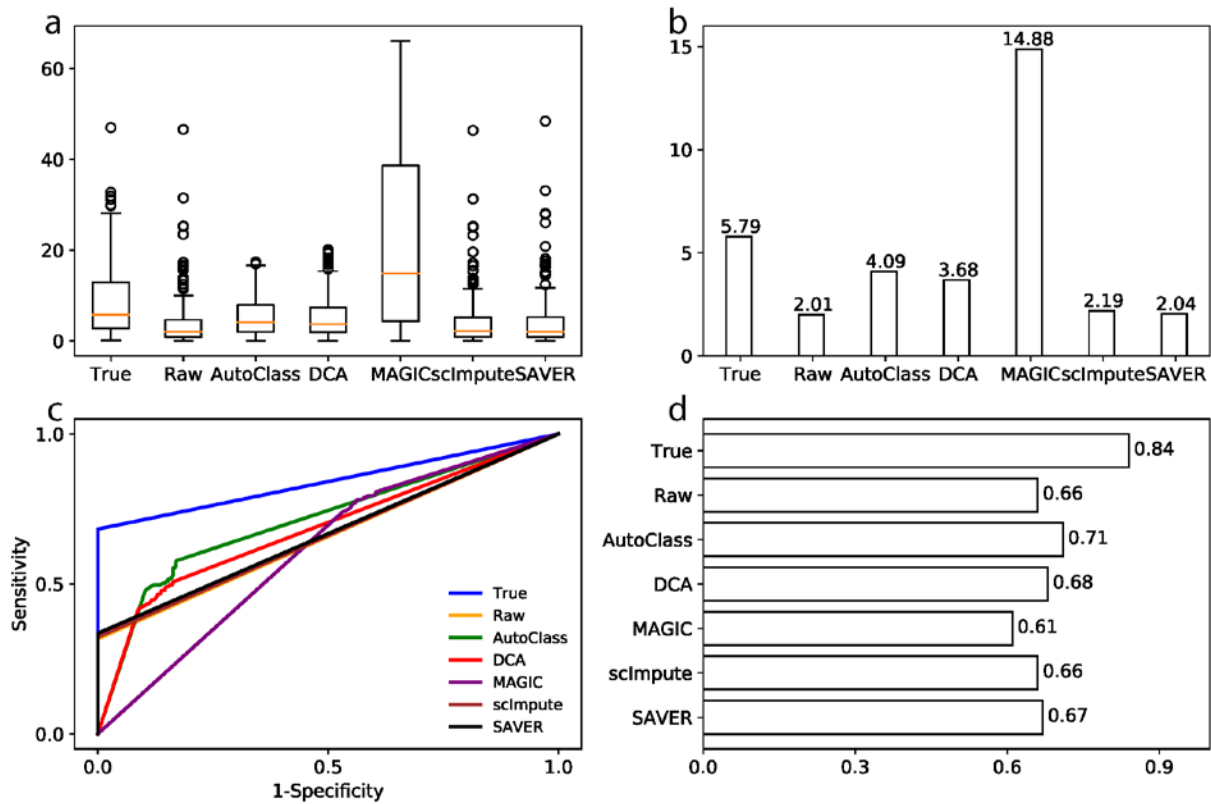

**Supplementary Figure 2** Differential expression analysis for Dataset 9 (Gaussian noise). **a** and **b** T-statistics and their median for truly differentially expressed genes. **c** and **d** ROC curves and areas under the ROC curves. Experiments settings are similar to those in Figure 3 a-d. In **a**, the box represents the interquartile range, the horizontal line in the box is the median, and the whiskers represent 1.5 times the interquartile range, with sample size  $n=53$  marker genes.

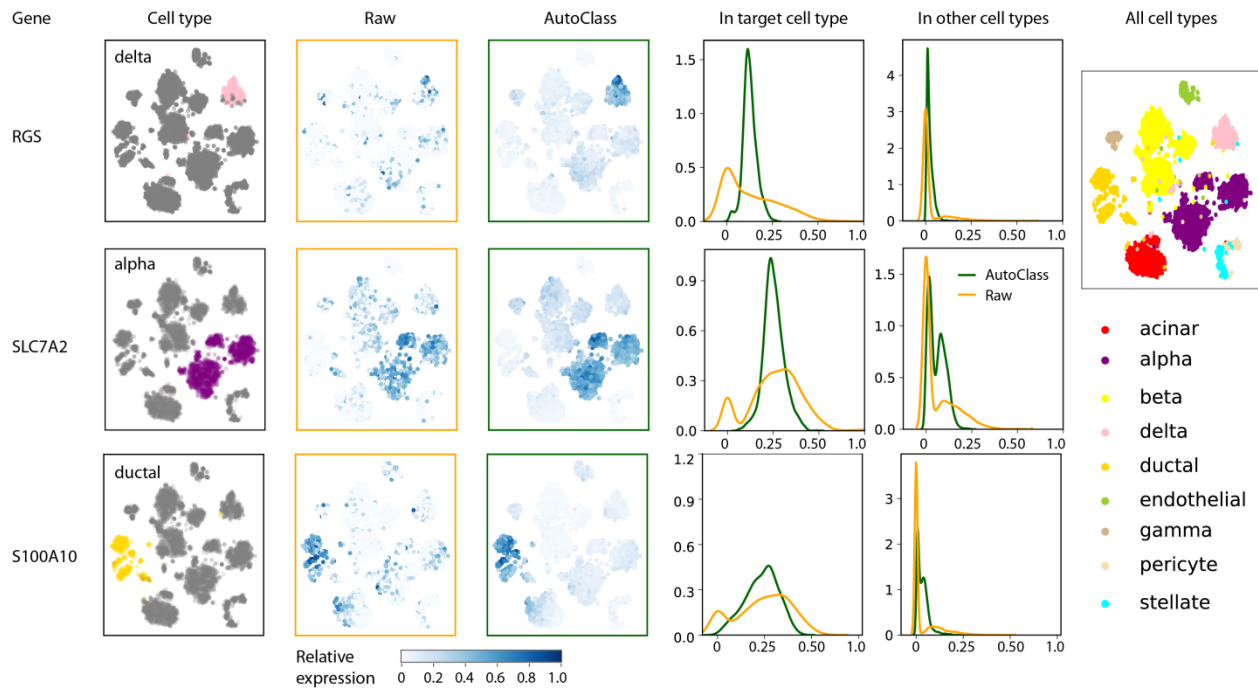

**Supplementary Figure 3** AutoClass improves potential marker genes identification. a. RGS2 in delta cells, b SLC7A2 in alpha cells, c S100A10 in ductal cells. The expression data showed in column 2-5 is the relative log<sub>2</sub> expression, i.e. log<sub>2</sub> based expression scaled by the maximum of each gene in raw data. The t-SNE plots were generated from raw data.

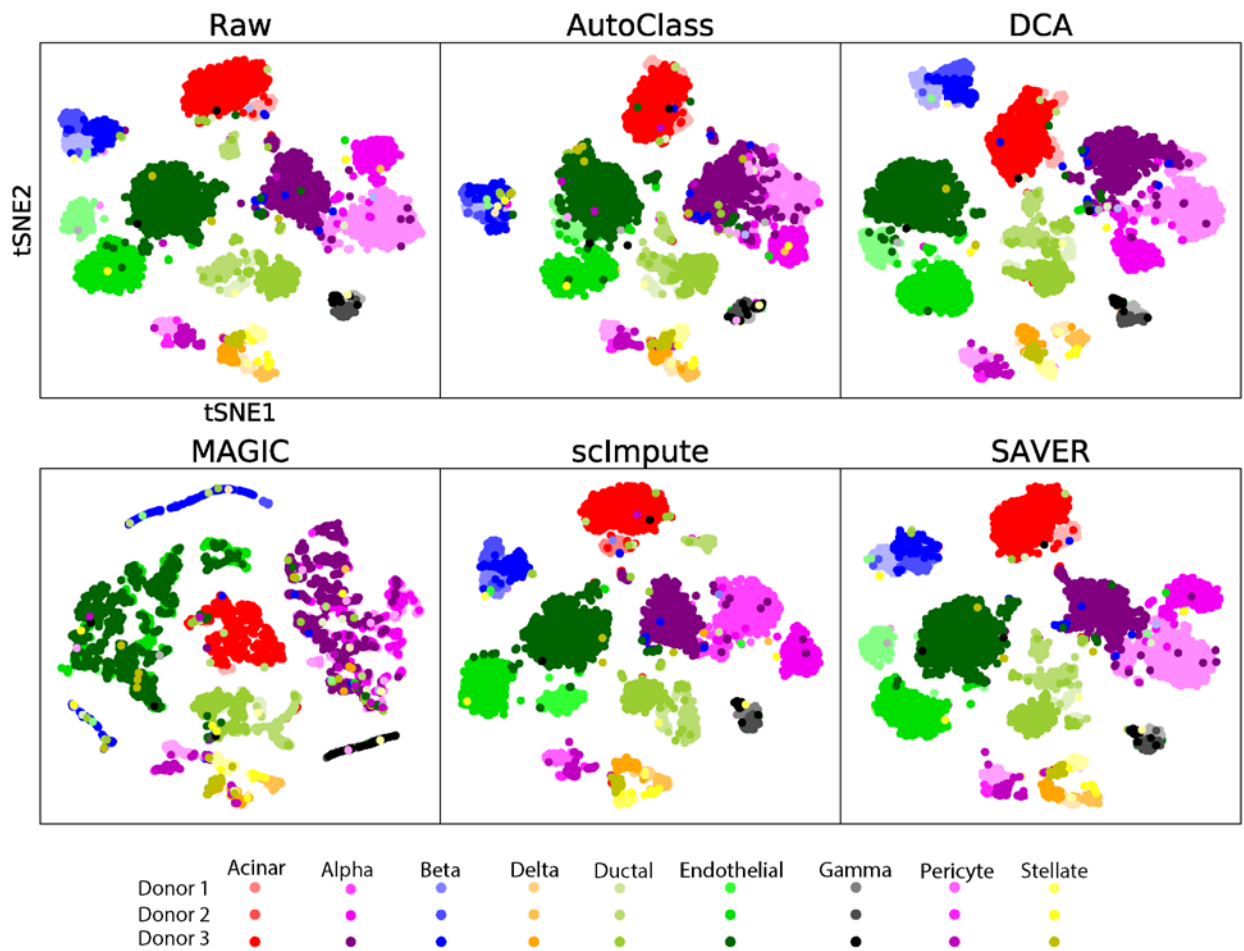

**Supplementary Figure 4** t-SNE plots for raw and imputed data for Baron dataset. Experiments settings are similar to those in Figure 5a.

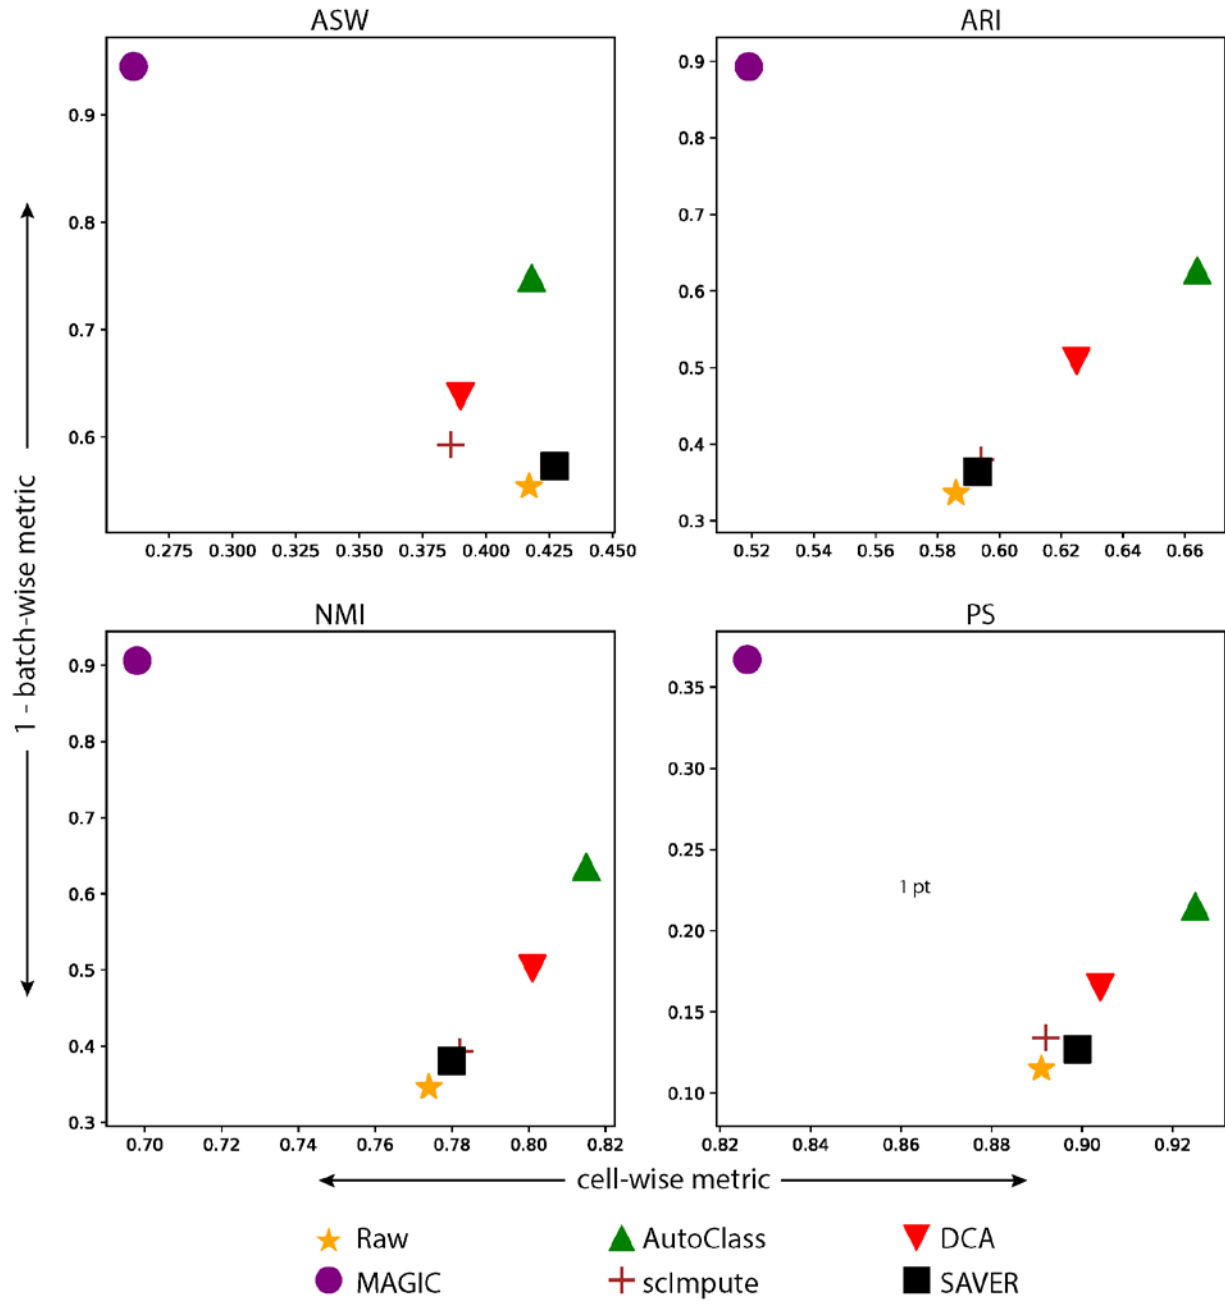

**Supplementary Figure 5** Evaluation of batch and cell type separation in raw and imputed data by four different metrics for Baron dataset. Experiments settings are similar to those in Figure 5b.

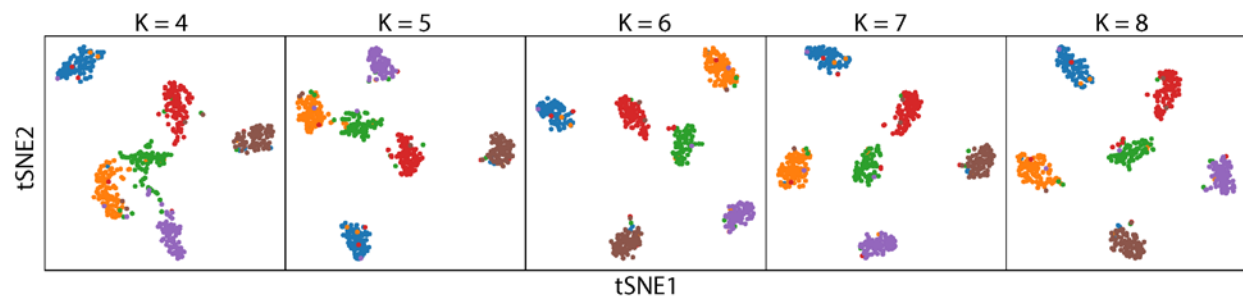

**Supplementary Figure 6** t-SNE plots of Dataset 1 imputed by AutoClass with different  $K$  in pre-clustering. Experiments settings are similar to those in Figure 6a.

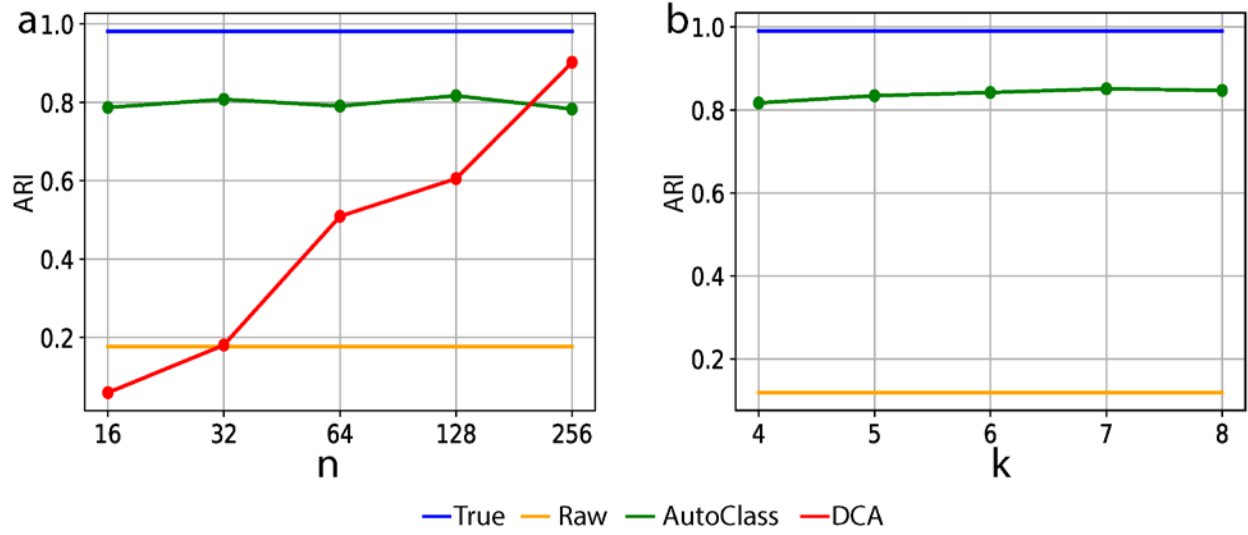

**Supplementary Figure 7** ARI of K-means clustering on t-SNE transformed data for Dataset 1 over **a** different bottleneck layer sizes and **b** different choices of  $K$  in pre-clustering of AutoClass (details are described in main text and Methods). Experiments settings are similar to those in Figure 6c and 6d.



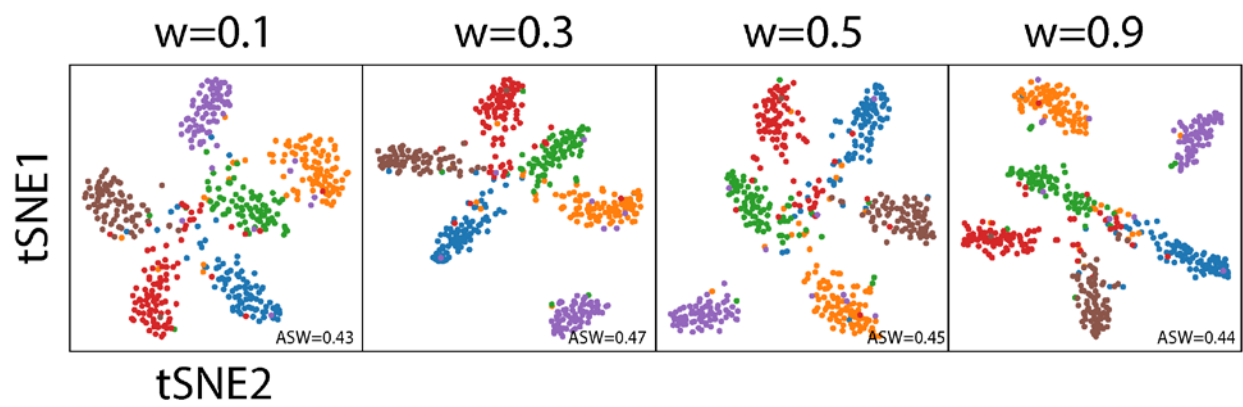

**Supplementary Figure 8** t-SNE plots for Dataset 1 after AutoClass imputation over different classifier weights. Experiments settings are similar to those in Figure 6a.

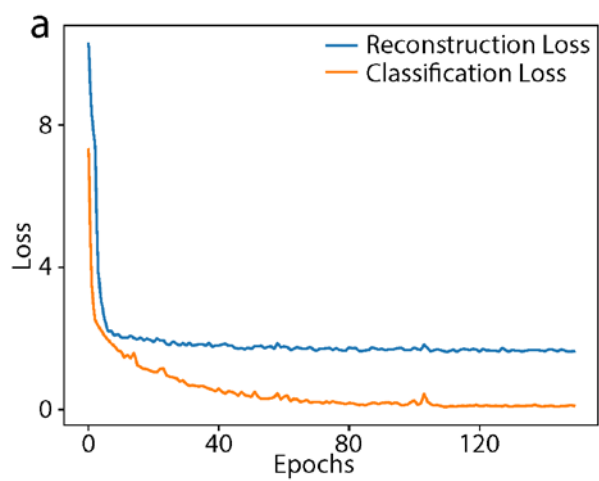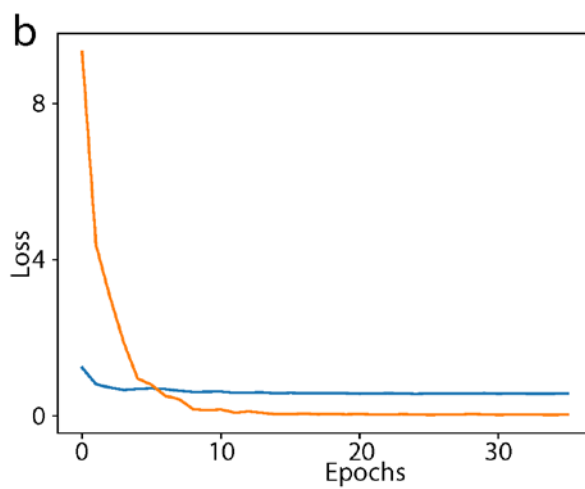

Supplementary Figure 9 AutoClass loss curves. **a** Dataset 1. **b** Buettner dataset.

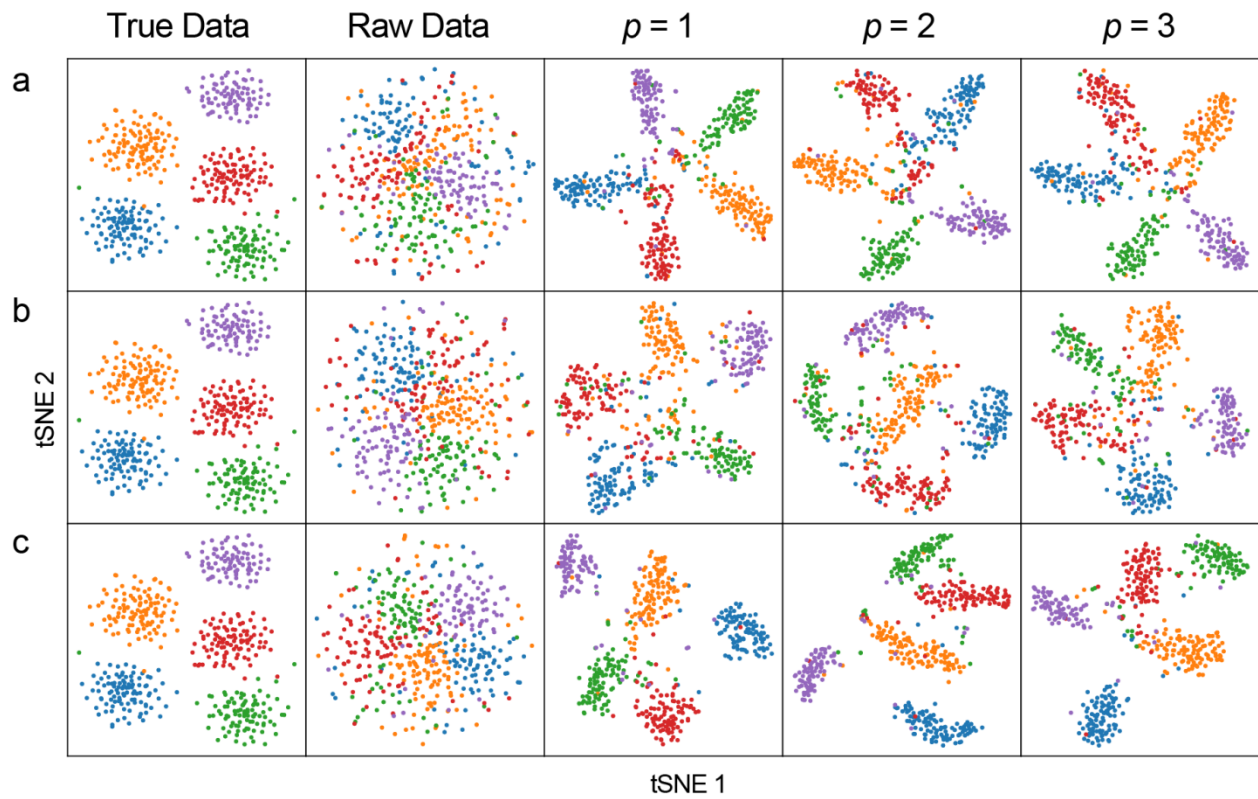

**Supplementary Figure 10.** Denoising using AutoClass with different  $p$  parameter values in its reconstruction loss  $|\bar{X} - Y_k|^p$ . **a** Dataset 2 (dropout noise), **b** Dataset3 (Uniform noise) and **c** Dataset 7 (Negative Binomial noise). Experiments settings are similar to those in Figure 6a.

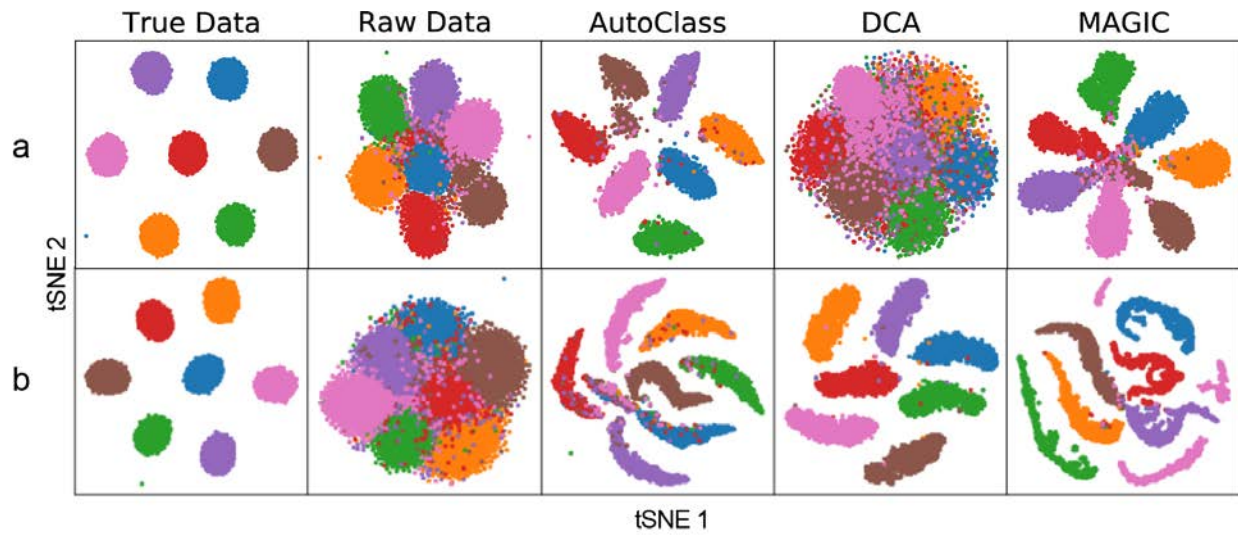

**Supplementary Figure 11** Imputation results for simulated datasets with both large feature size (10000 genes) and sample size (10000 cells). Data were simulated using **a** Li et al Method<sup>11</sup> (Dataset 10), and **b** Splatter<sup>13</sup> (Dataset 11). Note SAVER and scImpute were included in these large datasets analyses because they are too slow (Figure 7) and could not complete these tasks in a reasonable amount of time on our working machine.

| Dataset <sup>Ref</sup> | Description                        | Cell groups | Sample batches | Cells | % zero counts | AutoClass setting       |
|------------------------|------------------------------------|-------------|----------------|-------|---------------|-------------------------|
| Baron <sup>16</sup>    | Human pancreatic islets cells      | 8           | 3              | 7,162 | 82.21         | <i>dropout_rate=0.3</i> |
| Villani <sup>26</sup>  | Human blood dendritic cells        | 4           | 2              | 768   | 47.33         | <i>dropout_rate=0.3</i> |
| Lake <sup>20</sup>     | Human brain frontal cortex cells   | 11          | NA             | 8,592 | 73.39         | Default                 |
| Zeisel <sup>21</sup>   | Mouse cortex and hippocampus cells | 9           | NA             | 3,005 | 48.58         | Default                 |
| Buettner <sup>2</sup>  | Mouse embryonic stem cells         | 3           | NA             | 182   | 37.92         | Default                 |
| Usoskin <sup>19</sup>  | Mouse neuronal cells               | 4           | NA             | 622   | 95.83         | Default                 |
| Tian <sup>27</sup>     | Single cell mixture                | 5           | NA             | 305   | 64.27         | Default                 |

**Supplementary Table 1** Summary of real scRNA-seq datasets used in this study.

| Dataset              | Genes/Cells     | Cell groups | Splatter dropout* | AutoClass setting            |
|----------------------|-----------------|-------------|-------------------|------------------------------|
| Dataset 1            | 1000/500        | 6           | -1/5/1.5          | Default                      |
| Dataset 2            | 1000/500        | 5           | -2.5/2.5          | Default                      |
| Dataset 8            | 1000/500        | 2           | -1/3              | <i>num_cluster</i> = [2,3,4] |
| Dataset 10           | 10000/10,000    | 7           | NA <sup>#</sup>   | Default                      |
| Dataset 11           | 10000/10,000    | 7           | -1/2.5            | Default                      |
| Scalability Datasets | 1000/1000-32000 | 5           | -2.5/2.5          | Default                      |
| Tian                 | 1000/305        | 5           | -2.5/3.5          | Default                      |
| Tian                 | 5000/305        | 5           | -2/3              | Default                      |

**Supplementary Table 2** Summary for simulated scRNA-seq datasets with dropout noise used in this study.

\*Splatter dropout settings: *dropout.shape/dropout.mid.* <sup>#</sup> dropout added following Li et al method<sup>11</sup>.

| Dataset         | Noise Type        | <i>numpy.random</i> function | numpy setting       | AutoClass setting            |
|-----------------|-------------------|------------------------------|---------------------|------------------------------|
| Dataset 3       | Uniform           | <i>randint</i>               | low=-10, high=10    | Default                      |
| Dataset 4       | Gaussian          | <i>normal</i>                | loc=0, scale=6      | Default                      |
| Dataset 5       | Gamma             | <i>gamma</i>                 | shape=0.5, scale=12 | Default                      |
| Dataset 6       | Poisson           | <i>poisson</i>               | lam=6               | Default                      |
| Dataset 7       | Negative Binomial | <i>negative_binomial</i>     | n=10, p=0.45        | Default                      |
| Dataset 9       | Gaussian          | <i>normal</i>                | loc=0, scale=18     | <i>num_cluster</i> = [2,3,4] |
| Tian (1k genes) | Negative Binomial | <i>negative_binomial</i>     | n=10, p=0.2         | Default                      |
| Tian (5k genes) | Negative Binomial | <i>negative_binomia</i>      | n=15, p=0.2         | Default                      |

**Supplementary Table 3** Summary for simulated scRNA-seq datasets with non-dropout noises used in this study. Note Dataset 3-7 were generated from the true data of Dataset 2 above, Dataset 9 from Dataset 8 above.
